# Supplementary material
Source: PubMed Central journal article supplement (PMC3707946)
Supplement: NIHMS451432-supplement-Supp_Material.pdf [file NIHMS451432-supplement-Supp_Material.pdf]

**Moderate to vigorous physical activity interactions with genetic variants and body mass index in a large US ethnically diverse cohort**

Richardson AS,<sup>1,2</sup> North, KE,<sup>3,4</sup> Graff M,<sup>1,4</sup> Young KM,<sup>1,4</sup> Mohlke KL,<sup>3,5</sup> Lange LA,<sup>3,5</sup> Lange EM,<sup>3,5</sup> Harris KM,<sup>1,6</sup> Gordon-Larsen P<sup>1,2</sup>

<sup>1</sup>Carolina Population Center, <sup>2</sup>Department of Nutrition Gillings School of Global Public Health, <sup>3</sup>Carolina Center for Genome Sciences, <sup>4</sup>Department of Epidemiology,

<sup>5</sup>Department of Genetics, University of North Carolina, Chapel Hill, <sup>6</sup>Department of Sociology

North Carolina, USA

**Table S1.** List of 41 well-established adiposity related SNPs considered for interaction with MVPA in the current study

| SNP                     | Nearby gene                     | Chromosome | Position  |
|-------------------------|---------------------------------|------------|-----------|
| rs10146997              | <i>NRXN3</i>                    | 14         | 79014915  |
| rs10508503 <sup>2</sup> | <i>PTER</i>                     | 10         | 16339957  |
| rs10767664              | <i>BDNF</i>                     | 11         | 27682562  |
| rs1077393               | <i>NCR3_BAT2</i>                | 6          | 31718508  |
| rs10938397              | <i>GNPDA2</i>                   | 4          | 45023455  |
| rs10968576              | <i>LRRN6C</i>                   | 9          | 28404339  |
| rs12444979 <sup>2</sup> | <i>GPRC5B</i>                   | 16         | 19841101  |
| rs12970134 <sup>1</sup> | <i>MC4R</i>                     | 18         | 56035730  |
| rs13078807 <sup>1</sup> | <i>CADM2</i>                    | 3          | 85966840  |
| rs13107325 <sup>2</sup> | <i>SLC39A8</i>                  | 4          | 103545887 |
| rs1424233               | <i>MAF</i>                      | 16         | 78240252  |
| rs1514175 <sup>1</sup>  | <i>TNNI3K</i>                   | 1          | 74703665  |
| rs1555543 <sup>1</sup>  | <i>PTBP2</i>                    | 1          | 96656818  |
| rs1805081               | <i>NPC1</i>                     | 18         | 19394430  |
| rs206936                | <i>NUDT3</i>                    | 6          | 34410847  |
| rs2112347 <sup>1</sup>  | <i>POC5 (formerly FLJ35779)</i> | 5          | 7505998   |
| rs2241423               | <i>MAP2K5</i>                   | 15         | 65873892  |
| rs2287019               | <i>QPCTL</i>                    | 19         | 50894012  |
| rs2444217               | <i>ADCY9</i>                    | 16         | 3978388   |
| rs2568958 <sup>1</sup>  | <i>NEGR1</i>                    | 1          | 72477137  |
| rs2605100               | <i>LYPLAL1</i>                  | 1          | 216032619 |
| rs2890652 <sup>1</sup>  | <i>LRP1B</i>                    | 2          | 142793663 |
| rs29941 <sup>1</sup>    | <i>KCTD15</i>                   | 19         | 39001372  |
| rs3810291               | <i>TMEM160</i>                  | 19         | 52260843  |
| rs3817334               | <i>MTCH2</i>                    | 11         | 47607569  |
| rs4712652               | <i>PRL</i>                      | 6          | 22186594  |
| rs4771122 <sup>1</sup>  | <i>MTIF3</i>                    | 13         | 26918180  |
| rs4788102 <sup>2</sup>  | <i>SH2B1</i>                    | 16         | 28780899  |
| rs4929949 <sup>1</sup>  | <i>RPL27A</i>                   | 11         | 8561169   |
| rs543874 <sup>1</sup>   | <i>SEC16B/LZTR2</i>             | 1          | 174621137 |
| rs545854                | <i>MSRA</i>                     | 8          | 9897490   |
| rs571312 <sup>1</sup>   | <i>MC4R</i>                     | 18         | 55990749  |
| rs6548238 <sup>2</sup>  | <i>TMEM18</i>                   | 1          | 624905    |
| rs713586                | <i>POMC</i>                     | 2          | 25069659  |
| rs7138803               | <i>FAIM2</i>                    | 12         | 48533735  |
| rs7359397 <sup>1</sup>  | <i>SH2B1_APOB48</i>             | 16         | 28793160  |
| rs7647305               | <i>ETV5</i>                     | 3          | 187316992 |
| rs867559                | <i>LMX1B</i>                    | 9          | 126544879 |
| rs887912 <sup>1</sup>   | <i>FANCL</i>                    | 2          | 59214528  |
| rs987237                | <i>TFAP2B</i>                   | 6          | 50911009  |

rs9939609

*FTO*

16

52378028

---

Abbreviations: SNP, single nucleotide polymorphism, MVPA, moderate to vigorous physical activity, EA, European Americans, AA, African Americans, HA, Hispanic Americans

Sorted by rs number

<sup>1</sup> Not considered for interaction assessment in AA

<sup>2</sup> Not considered for interaction assessment in HA

<sup>3</sup> Not considered for interaction in EA

**Table S2.** Allele frequencies for 41 well-established adiposity related SNPs<sup>1</sup> by race/ethnicity

| Nearby gene         | SNP        | European American | African American | Hispanic American |
|---------------------|------------|-------------------|------------------|-------------------|
| <i>ADCY9</i>        | rs2444217  | 0.57              | 0.57             | 0.57              |
| <i>BDNF</i>         | rs10767664 | 0.79              | 0.79             | 0.79              |
| <i>CADM2</i>        | rs13078807 | 0.20              | 0.20             | 0.20              |
| <i>ETV5</i>         | rs7647305  | 0.79              | 0.79             | 0.79              |
| <i>FAIM2</i>        | rs7138803  | 0.38              | 0.38             | 0.38              |
| <i>FANCL</i>        | rs887912   | 0.28              | 0.28             | 0.28              |
| <i>FTO</i>          | rs9939609  | 0.39              | 0.39             | 0.39              |
| <i>GNPDA2</i>       | rs10938397 | 0.43              | 0.43             | 0.43              |
| <i>GPRC5B</i>       | rs12444979 | 0.86              | 0.86             | 0.86              |
| <i>KCTD15</i>       | rs29941    | 0.68              | 0.68             | 0.68              |
| <i>LMX1B</i>        | rs867559   | 0.19              | 0.19             | 0.19              |
| <i>LRP1B</i>        | rs2890652  | 0.16              | 0.16             | 0.16              |
| <i>LRRN6C</i>       | rs10968576 | 0.31              | 0.31             | 0.31              |
| <i>LYPLAL1</i>      | rs2605100  | 0.29              | 0.29             | 0.29              |
| <i>MAF</i>          | rs1424233  | 0.48              | 0.48             | 0.48              |
| <i>MAP2K5</i>       | rs2241423  | 0.77              | 0.77             | 0.77              |
| <i>MC4R</i>         | rs12970134 | 0.26              | 0.26             | 0.26              |
| <i>MC4R</i>         | rs571312   | 0.23              | 0.23             | 0.23              |
| <i>MSRA</i>         | rs545854   | 0.16              | 0.16             | 0.16              |
| <i>MTCH2</i>        | rs3817334  | 0.40              | 0.40             | 0.40              |
| <i>MTIF3</i>        | rs4771122  | 0.22              | 0.22             | 0.22              |
| <i>NCR3_BAT2</i>    | rs1077393  | 0.49              | 0.49             | 0.49              |
| <i>NEGR1</i>        | rs2568958  | 0.63              | 0.63             | 0.63              |
| <i>NPC1</i>         | rs1805081  | 0.60              | 0.60             | 0.60              |
| <i>NRXN3</i>        | rs10146997 | 0.79              | 0.79             | 0.79              |
| <i>NUDT3</i>        | rs206936   | 0.21              | 0.21             | 0.21              |
| <i>POC5</i>         | rs2112347  | 0.63              | 0.63             | 0.63              |
| <i>POMC</i>         | rs713586   | 0.48              | 0.48             | 0.48              |
| <i>PRL</i>          | rs4712652  | 0.42              | 0.42             | 0.42              |
| <i>PTBP2</i>        | rs1555543  | 0.59              | 0.59             | 0.59              |
| <i>PTER</i>         | rs10508503 | 0.92              | 0.92             | 0.92              |
| <i>QPCTL</i>        | rs2287019  | 0.82              | 0.82             | 0.82              |
| <i>RPL27A</i>       | rs4929949  | 0.51              | 0.51             | 0.51              |
| <i>SEC16B/LZTR2</i> | rs543874   | 0.20              | 0.20             | 0.20              |
| <i>SH2B1</i>        | rs4788102  | 0.39              | 0.39             | 0.39              |
| <i>SH2B1_APOB48</i> | rs7359397  | 0.39              | 0.39             | 0.39              |
| <i>SLC39A8</i>      | rs13107325 | 0.08              | 0.08             | 0.08              |
| <i>TFAP2B</i>       | rs987237   | 0.18              | 0.18             | 0.18              |
| <i>TMEM160</i>      | rs3810291  | 0.67              | 0.67             | 0.67              |
| <i>TMEM18</i>       | rs6548238  | 0.83              | 0.83             | 0.83              |
| <i>TNNI3K</i>       | rs1514175  | 0.44              | 0.44             | 0.44              |

Abbreviations: BMI, body mass index, SNP, single nucleotide polymorphism, MVPA, moderate to vigorous physical activity, CI confidence interval

Sorted by nearby gene

<sup>1</sup>Considered for interaction assessment 41 SNPs in EA, 37 in HA, and 19 in AA

**Table S3.** Estimated main effects<sup>1</sup> of 41 well-established adiposity related SNPs<sup>2</sup> on adolescent BMI-for-age Z scores, by race/ethnicity

| Nearby gene         | SNP        | BMI-for-age Z scores |              |          |                  |              |        |                   |              |        |
|---------------------|------------|----------------------|--------------|----------|------------------|--------------|--------|-------------------|--------------|--------|
|                     |            | European American    |              |          | African American |              |        | Hispanic American |              |        |
|                     |            | $\beta$              | (95% CI)     | p        | $\beta$          | (95% CI)     | p      | $\beta$           | (95% CI)     | p      |
| <i>ADCY9</i>        | rs2444217  | -0.03                | (-0.07,0.02) | 0.2264   | 0.06             | (-0.03,0.14) | 0.1894 | -0.04             | (-0.13,0.05) | 0.3830 |
| <i>BDNF</i>         | rs10767664 | 0.06                 | (0.00,0.11)  | 0.0336   | -0.04            | (-0.19,0.10) | 0.5692 | 0.10              | (0.00,0.21)  | 0.0561 |
| <i>CADM2</i>        | rs13078807 | 0.06                 | (0.01,0.11)  | 0.0229   |                  |              |        | 0.08              | (-0.04,0.20) | 0.2157 |
| <i>ETV5</i>         | rs7647305  | 0.03                 | (-0.02,0.08) | 0.2283   | 0.09             | (0.01,0.16)  | 0.0195 | 0.00              | (-0.11,0.10) | 0.9346 |
| <i>FAIM2</i>        | rs7138803  | 0.03                 | (-0.02,0.07) | 0.2610   | 0.12             | (0.02,0.22)  | 0.0138 | -0.01             | (-0.11,0.09) | 0.8483 |
| <i>FANCL</i>        | rs887912   | 0.06                 | (0.02,0.11)  | 0.0090   |                  |              |        | -0.06             | (-0.17,0.05) | 0.3057 |
| <i>FTO</i>          | rs9939609  | 0.16                 | (0.12,0.21)  | 1.86E-13 | 0.02             | (-0.05,0.09) | 0.5276 | 0.09              | (0.00,0.18)  | 0.0621 |
| <i>GNPDA2</i>       | rs10938397 | 0.05                 | (0.00,0.09)  | 0.0347   | 0.12             | (0.04,0.21)  | 0.0051 | 0.06              | (-0.03,0.15) | 0.1958 |
| <i>GPRC5B</i>       | rs12444979 | 0.06                 | (0.00,0.12)  | 0.0476   |                  |              |        | 0.12              | (-0.03,0.26) | 0.1073 |
| <i>KCTD15</i>       | rs29941    | 0.03                 | (-0.02,0.07) | 0.2322   |                  |              |        | 0.02              | (-0.07,0.11) | 0.6703 |
| <i>LMX1B</i>        | rs867559   | 0.03                 | (-0.02,0.08) | 0.3031   | -0.01            | (-0.08,0.07) | 0.9002 | 0.02              | (-0.07,0.11) | 0.6286 |
| <i>LRP1B</i>        | rs2890652  | 0.04                 | (-0.02,0.09) | 0.2124   |                  |              |        | 0.09              | (-0.04,0.21) | 0.1785 |
| <i>LRRN6C</i>       | rs10968576 | 0.01                 | (-0.04,0.05) | 0.8087   | 0.10             | (0.00,0.19)  | 0.0397 | 0.05              | (-0.05,0.15) | 0.3403 |
| <i>LYPLAL1</i>      | rs2605100  | -0.01                | (-0.06,0.04) | 0.6153   |                  |              |        | 0.00              | (-0.09,0.09) | 0.9497 |
| <i>SEC16B/LZTR2</i> | rs543874   | 0.09                 | (0.04,0.14)  | 0.0010   |                  |              |        | 0.10              | (-0.01,0.21) | 0.0734 |
| <i>MAF</i>          | rs1424233  | 0.00                 | (-0.04,0.04) | 0.9368   | 0.03             | (-0.05,0.11) | 0.5060 | 0.06              | (-0.02,0.15) | 0.1462 |
| <i>MAP2K5</i>       | rs2241423  | 0.06                 | (0.01,0.11)  | 0.0127   | 0.06             | (-0.02,0.13) | 0.1277 | -0.05             | (-0.14,0.04) | 0.2465 |
| <i>MC4R</i>         | rs12970134 | 0.07                 | (0.02,0.12)  | 0.0036   |                  |              |        | 0.06              | (-0.05,0.17) | 0.3199 |
| <i>MC4R</i>         | rs571312   | 0.10                 | (0.05,0.15)  | 0.00007  |                  |              |        | 0.10              | (-0.02,0.21) | 0.1024 |
| <i>MSRA</i>         | rs545854   | 0.03                 | (-0.02,0.09) | 0.2492   |                  |              |        | -0.02             | (-0.12,0.08) | 0.6522 |
| <i>MTCH2</i>        | rs3817334  | 0.03                 | (-0.01,0.07) | 0.1678   | 0.05             | (-0.03,0.13) | 0.2590 | 0.03              | (-0.06,0.12) | 0.4806 |
| <i>MTIF3</i>        | rs4771122  | -0.01                | (-0.06,0.04) | 0.7929   |                  |              |        | 0.10              | (-0.01,0.21) | 0.0694 |

**Table S3.** (continued)

| Nearby gene         | SNP        | BMI-for-age Z scores |              |          |                  |              |        |                   |              |        |
|---------------------|------------|----------------------|--------------|----------|------------------|--------------|--------|-------------------|--------------|--------|
|                     |            | European American    |              |          | African American |              |        | Hispanic American |              |        |
|                     |            | $\beta$              | (95% CI)     | p        | $\beta$          | (95% CI)     | p      | $\beta$           | (95% CI)     | p      |
| <i>NCR3_BAT2</i>    | rs1077393  | 0.00                 | (-0.05,0.04) | 0.8537   | 0.02             | (-0.06,0.09) | 0.6383 | 0.05              | (-0.04,0.13) | 0.2619 |
| <i>NEGR1</i>        | rs2568958  | 0.05                 | (0.00,0.09)  | 0.0407   |                  |              |        | 0.05              | (-0.05,0.14) | 0.3276 |
| <i>NPC1</i>         | rs1805081  | 0.01                 | (-0.03,0.06) | 0.5600   |                  |              |        | 0.04              | (-0.06,0.14) | 0.4118 |
| <i>NRXN3</i>        | rs10146997 | -0.03                | (-0.09,0.02) | 0.2230   | -0.02            | (-0.09,0.06) | 0.6654 | -0.05             | (-0.15,0.06) | 0.3795 |
| <i>NUDT3</i>        | rs206936   | 0.06                 | (0.00,0.11)  | 0.0376   | -0.02            | (-0.09,0.05) | 0.5967 | -0.02             | (-0.11,0.07) | 0.6274 |
| <i>POC5</i>         | rs2112347  | 0.02                 | (-0.02,0.07) | 0.3654   |                  |              |        | 0.04              | (-0.05,0.13) | 0.4195 |
| <i>POMC</i>         | rs713586   | 0.06                 | (0.02,0.11)  | 0.0043   | 0.00             | (-0.10,0.10) | 0.9766 | -0.03             | (-0.12,0.05) | 0.4403 |
| <i>PRL</i>          | rs4712652  | 0.03                 | (-0.01,0.08) | 0.1132   | -0.02            | (-0.09,0.06) | 0.6544 | -0.01             | (-0.09,0.08) | 0.8699 |
| <i>PTBP2</i>        | rs1555543  | 0.05                 | (0.01,0.10)  | 0.0160   |                  |              |        | 0.07              | (-0.02,0.16) | 0.1164 |
| <i>PTER</i>         | rs10508503 | 0.12                 | (0.04,0.20)  | 0.0024   | -0.17            | (-0.43,0.10) | 0.2264 |                   |              |        |
| <i>QPCTL</i>        | rs2287019  | 0.03                 | (-0.02,0.09) | 0.2111   |                  |              |        | 0.01              | (-0.12,0.13) | 0.9157 |
| <i>RPL27A</i>       | rs4929949  | -0.02                | (-0.06,0.02) | 0.3014   |                  |              |        | 0.01              | (-0.08,0.09) | 0.8980 |
| <i>SEC16B/LZTR2</i> | rs543874   | 0.09                 | (0.04,0.14)  | 0.0010   |                  |              |        | 0.10              | (-0.01,0.21) | 0.0734 |
| <i>SH2B1</i>        | rs4788102  | 0.01                 | (-0.03,0.05) | 0.6631   | 0.01             | (-0.07,0.09) | 0.8391 |                   |              |        |
| <i>SH2B1_APOB48</i> | rs7359397  | 0.01                 | (-0.03,0.06) | 0.5874   |                  |              |        | 0.08              | (-0.01,0.16) | 0.0899 |
| <i>SLC39A8</i>      | rs13107325 | 0.04                 | (-0.04,0.12) | 0.3314   |                  |              |        |                   |              |        |
| <i>TFAP2B</i>       | rs987237   | 0.10                 | (0.05,0.16)  | 0.0002   |                  |              |        | 0.12              | (0.02,0.21)  | 0.0156 |
| <i>TMEM160</i>      | rs3810291  | 0.04                 | (-0.01,0.08) | 0.0923   | 0.06             | (-0.03,0.15) | 0.1842 | -0.04             | (-0.13,0.05) | 0.3849 |
| <i>TMEM18</i>       | rs6548238  | 0.15                 | (0.09,0.20)  | 1.28E-07 |                  |              |        |                   |              |        |
| <i>TNNI3K</i>       | rs1514175  | 0.06                 | (0.02,0.11)  | 0.0040   |                  |              |        | 0.01              | (-0.07,0.10) | 0.7708 |

Abbreviations: SNP, single nucleotide polymorphism, MVPA, moderate to vigorous physical activity, BMI, body mass index, CI confidence interval

Sorted by nearby gene

<sup>1</sup>Main effect model: Multivariable linear model of adolescent BMI regressed on SNP, controlling for age, sex, MVPA, current smoking, screen time, region, indicator for self-reported heights and weights, oversampling of highly educated African Americans (AA stratum only), Hispanic subpopulation ancestry, as well as an indicator for foreign born (n= 268, HA stratum only). Random

intercepts allowed for individual, family and school with no sample weighting. Models run separately for each SNP and race/ethnicity. P values corrected for multiple testing are  $\alpha$  equal to 0.05/number of SNPs tested (0.0012 in EA, 0.0026 in AA, 0.0014 in HA)

<sup>2</sup>Considered for interaction assessment 41 SNPs in EA, 37 in HA, and 19 in AA



**Table S4.** Estimated main effects<sup>1</sup> of 41 well-established adiposity related SNPs<sup>2</sup> on adolescent weight-for-age Z scores, by race/ethnicity

| Nearby gene    | SNP        | Weight-for-age Z scores |              |          |                  |              |          |                   |              |          |
|----------------|------------|-------------------------|--------------|----------|------------------|--------------|----------|-------------------|--------------|----------|
|                |            | European American       |              |          | African American |              |          | Hispanic American |              |          |
|                |            | $\beta$                 | (95% CI)     | p        | $\beta$          | (95% CI)     | p        | $\beta$           | (95% CI)     | p        |
| <i>ADCY9</i>   | rs2444217  | -0.02                   | (-0.06,0.02) | 0.3809   | 0.04             | (-0.05,0.12) | 0.4020   | -0.04             | (-0.13,0.05) | 0.3787   |
| <i>BDNF</i>    | rs10767664 | 0.06                    | (0.01,0.11)  | 0.0262   | -0.02            | (-0.16,0.13) | 0.8048   | 0.10              | (-0.01,0.21) | 0.0896   |
| <i>CADM2</i>   | rs13078807 | 0.05                    | (0.00,0.10)  | 0.0416   |                  |              |          | 0.18              | (0.05,0.30)  | 0.0052   |
| <i>ETV5</i>    | rs7647305  | 0.04                    | (-0.01,0.09) | 0.1398   | 0.08             | (0.01,0.15)  | 0.0231   | -0.06             | (-0.18,0.05) | 0.2707   |
| <i>FAIM2</i>   | rs7138803  | 0.04                    | (0.00,0.08)  | 0.0710   | 0.14             | (0.05,0.24)  | 0.0024   | 0.06              | (-0.04,0.16) | 0.2448   |
| <i>FANCL</i>   | rs887912   | 0.06                    | (0.01,0.10)  | 0.0116   |                  |              |          | -0.01             | (-0.12,0.10) | 0.8646   |
| <i>FTO</i>     | rs9939609  | 0.14                    | (0.10,0.18)  | 2.16E-11 | 0.01             | (-0.06,0.08) | 0.7419   | 0.08              | (-0.02,0.17) | 0.1058   |
| <i>GNPDA2</i>  | rs10938397 | 0.04                    | (0.00,0.08)  | 0.0418   | 0.13             | (0.04,0.21)  | 0.0037   | 0.07              | (-0.02,0.16) | 0.1279   |
| <i>GPRC5B</i>  | rs12444979 | 0.06                    | (0.01,0.12)  | 0.0315   |                  |              |          | 0.05              | (-0.10,0.20) | 0.5082   |
| <i>KCTD15</i>  | rs29941    | 0.03                    | (-0.01,0.07) | 0.1816   |                  |              |          | 0.02              | (-0.07,0.11) | 0.6809   |
| <i>LMX1B</i>   | rs867559   | 0.02                    | (-0.03,0.07) | 0.4011   | -0.03            | (-0.10,0.05) | 0.5140   | -0.02             | (-0.11,0.07) | 0.6297   |
| <i>LRP1B</i>   | rs2890652  | 0.03                    | (-0.03,0.08) | 0.3410   |                  |              |          | 0.15              | (0.03,0.28)  | 0.0180   |
| <i>LRRN6C</i>  | rs10968576 | 0.00                    | (-0.04,0.04) | 0.9598   | 0.10             | (0.01,0.19)  | 2.60E-02 | 0.04              | (-0.06,0.15) | 4.03E-01 |
| <i>LYPLAL1</i> | rs2605100  | 0.00                    | (-0.04,0.05) | 0.9555   |                  |              |          | 0.02              | (-0.07,0.11) | 0.6848   |
| <i>MAF</i>     | rs1424233  | 0.00                    | (-0.04,0.04) | 0.9396   | 0.01             | (-0.07,0.08) | 0.8378   | 0.01              | (-0.08,0.10) | 0.8544   |
| <i>MAP2K5</i>  | rs2241423  | 0.05                    | (0.01,0.10)  | 0.0268   | 0.06             | (-0.01,0.13) | 0.0868   | -0.01             | (-0.10,0.08) | 0.8739   |
| <i>MC4R</i>    | rs12970134 | 0.07                    | (0.02,0.11)  | 0.0054   |                  |              |          | 0.13              | (0.02,0.24)  | 0.0256   |
| <i>MC4R</i>    | rs571312   | 0.10                    | (0.05,0.14)  | 0.00009  |                  |              |          | 0.19              | (0.07,0.31)  | 0.0015   |
| <i>MSRA</i>    | rs545854   | 0.02                    | (-0.03,0.08) | 0.4510   |                  |              |          | -0.03             | (-0.13,0.07) | 0.5276   |
| <i>MTCH2</i>   | rs3817334  | 0.03                    | (-0.01,0.07) | 0.1448   | 0.05             | (-0.03,0.13) | 0.2322   | 0.01              | (-0.08,0.10) | 0.8593   |
| <i>MTIF3</i>   | rs4771122  | 0.01                    | (-0.04,0.06) | 0.6344   |                  |              |          | 0.08              | (-0.03,0.19) | 0.1721   |

**Table S4.** (continued)

| Nearby gene         | SNP        | Weight-for-age Z scores |              |          |                  |              |        |                   |              |        |
|---------------------|------------|-------------------------|--------------|----------|------------------|--------------|--------|-------------------|--------------|--------|
|                     |            | European American       |              |          | African American |              |        | Hispanic American |              |        |
|                     |            | $\beta$                 | (95% CI)     | p        | $\beta$          | (95% CI)     | p      | $\beta$           | (95% CI)     | p      |
| <i>NCR3_BAT2</i>    | rs1077393  | -0.03                   | (-0.08,0.01) | 0.0903   | 0.00             | (-0.07,0.08) | 0.9009 | 0.02              | (-0.07,0.10) | 0.7255 |
| <i>NEGR1</i>        | rs2568958  | 0.05                    | (0.01,0.09)  | 0.0243   |                  |              |        | 0.02              | (-0.07,0.12) | 0.6196 |
| <i>NPC1</i>         | rs1805081  | 0.01                    | (-0.03,0.05) | 0.5297   |                  |              |        | 0.05              | (-0.05,0.15) | 0.3717 |
| <i>NRXN3</i>        | rs10146997 | -0.02                   | (-0.08,0.03) | 0.3385   | -0.02            | (-0.09,0.05) | 0.6035 | -0.04             | (-0.15,0.07) | 0.4479 |
| <i>NUDT3</i>        | rs206936   | 0.06                    | (0.01,0.11)  | 0.0182   | -0.02            | (-0.09,0.05) | 0.6086 | 0.01              | (-0.08,0.10) | 0.7895 |
| <i>POC5</i>         | rs2112347  | 0.03                    | (-0.01,0.07) | 0.1905   |                  |              |        | 0.00              | (-0.09,0.10) | 0.9215 |
| <i>POMC</i>         | rs713586   | 0.05                    | (0.01,0.09)  | 0.0123   | 0.00             | (-0.09,0.10) | 0.9229 | -0.04             | (-0.13,0.04) | 0.3293 |
| <i>PRL</i>          | rs4712652  | 0.01                    | (-0.03,0.05) | 0.5911   | -0.03            | (-0.10,0.05) | 0.5115 | 0.00              | (-0.09,0.09) | 0.9956 |
| <i>PTBP2</i>        | rs1555543  | 0.04                    | (0.00,0.08)  | 0.0737   |                  |              |        | 0.06              | (-0.03,0.15) | 0.1897 |
| <i>PTER</i>         | rs10508503 | 0.07                    | (0.00,0.15)  | 0.0644   | -0.08            | (-0.34,0.18) | 0.5483 |                   |              |        |
| <i>QPCTL</i>        | rs2287019  | 0.02                    | (-0.03,0.07) | 0.4858   |                  |              |        | 0.03              | (-0.10,0.16) | 0.6267 |
| <i>RPL27A</i>       | rs4929949  | -0.01                   | (-0.05,0.03) | 0.7876   |                  |              |        | 0.00              | (-0.08,0.09) | 0.9292 |
| <i>SEC16B/LZTR2</i> | rs543874   | 0.08                    | (0.03,0.13)  | 0.0011   |                  |              |        | 0.10              | (-0.01,0.21) | 0.0880 |
| <i>SH2B1</i>        | rs4788102  | 0.01                    | (-0.03,0.05) | 0.5821   | 0.04             | (-0.04,0.12) | 0.2987 |                   |              |        |
| <i>SH2B1_APOB48</i> | rs7359397  | 0.01                    | (-0.03,0.05) | 0.5697   |                  |              |        | 0.02              | (-0.07,0.11) | 0.6129 |
| <i>SLC39A8</i>      | rs13107325 | 0.02                    | (-0.06,0.09) | 0.6786   |                  |              |        |                   |              |        |
| <i>TFAP2B</i>       | rs987237   | 0.10                    | (0.05,0.16)  | 0.0001   |                  |              |        | 0.11              | (0.01,0.21)  | 0.0249 |
| <i>TMEM160</i>      | rs3810291  | 0.01                    | (-0.03,0.06) | 0.5621   | 0.08             | (-0.01,0.16) | 0.0892 | -0.03             | (-0.12,0.06) | 0.5129 |
| <i>TMEM18</i>       | rs6548238  | 0.16                    | (0.10,0.21)  | 9.54E-09 |                  |              |        |                   |              |        |
| <i>TNNI3K</i>       | rs1514175  | 0.05                    | (0.01,0.09)  | 0.0099   |                  |              |        | 0.02              | (-0.07,0.10) | 0.7106 |

Abbreviations: SNP, single nucleotide polymorphism, MVPA, moderate to vigorous physical activity, BMI, body mass index, CI confidence interval

Sorted by nearby gene

<sup>1</sup>Main effect model: Multivariable linear model of adolescent BMI regressed on SNP, controlling for age, sex, MVPA, current smoking, screen time, region, indicator for self-reported heights and weights, oversampling of highly educated African Americans (AA stratum only), Hispanic subpopulation ancestry, as well as an indicator for foreign born (n= 268, HA stratum only). Random

intercepts allowed for individual, family and school with no sample weighting. Models run separately for each SNP and race/ethnicity. P values corrected for multiple testing are  $\alpha$  equal to 0.05/number of SNPs tested (0.0012 in EA, 0.0026 in AA, 0.0014 in HA)

<sup>2</sup>Considered for interaction assessment 41 SNPs in EA, 37 in HA, and 19 in AA

**Table S5.** Estimated main effects<sup>1</sup> of 41 well-established adiposity related SNPs<sup>2</sup> on adolescent height-for-age Z scores, by race/ethnicity

| Nearby gene    | SNP        | Height-for-age Z scores |              |        |                  |              |        |                   |               |        |
|----------------|------------|-------------------------|--------------|--------|------------------|--------------|--------|-------------------|---------------|--------|
|                |            | European American       |              |        | African American |              |        | Hispanic American |               |        |
|                |            | $\beta$                 | (95% CI)     | p      | $\beta$          | (95% CI)     | p      | $\beta$           | (95% CI)      | p      |
| <i>ADCY9</i>   | rs2444217  | 0.02                    | (-0.02,0.06) | 0.4076 | -0.01            | (-0.10,0.08) | 0.8216 | 0.00              | (-0.09,0.08)  | 0.9645 |
| <i>BDNF</i>    | rs10767664 | 0.02                    | (-0.03,0.07) | 0.4704 | 0.03             | (-0.12,0.18) | 0.6696 | 0.04              | (-0.07,0.14)  | 0.4930 |
| <i>CADM2</i>   | rs13078807 | 0.01                    | (-0.04,0.06) | 0.8116 |                  |              |        | 0.23              | (0.11,0.35)   | 0.0001 |
| <i>ETV5</i>    | rs7647305  | 0.04                    | (-0.01,0.08) | 0.1412 | 0.01             | (-0.06,0.09) | 0.7184 | -0.12             | (-0.23,-0.01) | 0.0267 |
| <i>FAIM2</i>   | rs7138803  | 0.04                    | (0.00,0.08)  | 0.0383 | 0.13             | (0.04,0.23)  | 0.0067 | 0.10              | (0.01,0.20)   | 0.0309 |
| <i>FANCL</i>   | rs887912   | -0.01                   | (-0.05,0.03) | 0.6693 |                  |              |        | 0.09              | (-0.02,0.20)  | 0.1018 |
| <i>FTO</i>     | rs9939609  | 0.01                    | (-0.03,0.05) | 0.5066 | -0.01            | (-0.09,0.06) | 0.6826 | -0.01             | (-0.10,0.08)  | 0.8574 |
| <i>GNPDA2</i>  | rs10938397 | 0.01                    | (-0.03,0.05) | 0.6197 | 0.01             | (-0.08,0.10) | 0.8536 | 0.05              | (-0.04,0.14)  | 0.2674 |
| <i>GPRC5B</i>  | rs12444979 | 0.01                    | (-0.05,0.06) | 0.7446 |                  |              |        | -0.11             | (-0.25,0.03)  | 0.1368 |
| <i>KCTD15</i>  | rs29941    | 0.01                    | (-0.03,0.05) | 0.6046 |                  |              |        | -0.02             | (-0.11,0.07)  | 0.6824 |
| <i>LMX1B</i>   | rs867559   | -0.01                   | (-0.05,0.04) | 0.8092 | -0.03            | (-0.11,0.05) | 0.4663 | -0.09             | (-0.18,-0.01) | 0.0297 |
| <i>LRP1B</i>   | rs2890652  | -0.02                   | (-0.07,0.04) | 0.5715 |                  |              |        | 0.16              | (0.04,0.28)   | 0.0092 |
| <i>LRRN6C</i>  | rs10968576 | -0.01                   | (-0.06,0.03) | 0.5457 | 0.06             | (-0.03,0.15) | 0.2079 | -0.01             | (-0.11,0.09)  | 0.8010 |
| <i>LYPLAL1</i> | rs2605100  | -0.01                   | (-0.05,0.04) | 0.7606 |                  |              |        | 0.06              | (-0.03,0.15)  | 0.1656 |
| <i>MAF</i>     | rs1424233  | 0.02                    | (-0.02,0.06) | 0.4234 | -0.02            | (-0.10,0.06) | 0.5713 | -0.09             | (-0.18,-0.01) | 0.0305 |
| <i>MAP2K5</i>  | rs2241423  | 0.00                    | (-0.05,0.05) | 0.9674 | 0.04             | (-0.03,0.12) | 0.2820 | 0.11              | (0.02,0.19)   | 0.0123 |
| <i>MC4R</i>    | rs12970134 | 0.03                    | (-0.02,0.07) | 0.2686 |                  |              |        | 0.14              | (0.03,0.24)   | 0.0123 |
| <i>MC4R</i>    | rs571312   | 0.03                    | (-0.01,0.08) | 0.1533 |                  |              |        | 0.20              | (0.09,0.31)   | 0.0006 |
| <i>MSRA</i>    | rs545854   | -0.02                   | (-0.08,0.03) | 0.4261 |                  |              |        | -0.06             | (-0.15,0.04)  | 0.2456 |
| <i>MTCH2</i>   | rs3817334  | 0.01                    | (-0.03,0.05) | 0.7510 | 0.04             | (-0.04,0.12) | 0.3213 | -0.02             | (-0.11,0.06)  | 0.6258 |
| <i>MTIF3</i>   | rs4771122  | 0.04                    | (0.00,0.09)  | 0.0794 |                  |              |        | -0.04             | (-0.14,0.07)  | 0.5046 |

**Table S5.** (continued)

| Nearby gene         | SNP        | Height-for-age Z scores |               |         |                  |              |        |                   |              |        |
|---------------------|------------|-------------------------|---------------|---------|------------------|--------------|--------|-------------------|--------------|--------|
|                     |            | European American       |               |         | African American |              |        | Hispanic American |              |        |
|                     |            | $\beta$                 | (95% CI)      | p       | $\beta$          | (95% CI)     | p      | $\beta$           | (95% CI)     | p      |
| <i>NCR3_BAT2</i>    | rs1077393  | -0.08                   | (-0.12,-0.04) | 0.00007 | -0.03            | (-0.10,0.05) | 0.4733 | -0.07             | (-0.15,0.01) | 0.0808 |
| <i>NEGR1</i>        | rs2568958  | 0.02                    | (-0.02,0.06)  | 0.4016  |                  |              |        | -0.06             | (-0.15,0.03) | 0.2095 |
| <i>NPC1</i>         | rs1805081  | 0.01                    | (-0.03,0.05)  | 0.5053  |                  |              |        | 0.01              | (-0.08,0.10) | 0.8197 |
| <i>NRXN3</i>        | rs10146997 | 0.02                    | (-0.02,0.07)  | 0.3155  | -0.01            | (-0.09,0.06) | 0.7078 | 0.01              | (-0.09,0.11) | 0.8205 |
| <i>NUDT3</i>        | rs206936   | 0.02                    | (-0.03,0.07)  | 0.3607  | 0.01             | (-0.07,0.08) | 0.8316 | 0.06              | (-0.02,0.15) | 0.1558 |
| <i>POC5</i>         | rs2112347  | 0.01                    | (-0.04,0.05)  | 0.8007  |                  |              |        | -0.06             | (-0.14,0.03) | 0.2118 |
| <i>POMC</i>         | rs713586   | 0.00                    | (-0.04,0.04)  | 0.9175  | -0.01            | (-0.11,0.09) | 0.8284 | 0.00              | (-0.08,0.09) | 0.9557 |
| <i>PRL</i>          | rs4712652  | -0.07                   | (-0.11,-0.03) | 0.0012  | -0.03            | (-0.10,0.05) | 0.5199 | 0.01              | (-0.07,0.10) | 0.7501 |
| <i>PTBP2</i>        | rs1555543  | -0.01                   | (-0.05,0.03)  | 0.4687  |                  |              |        | -0.01             | (-0.09,0.08) | 0.8865 |
| <i>PTER</i>         | rs10508503 | -0.07                   | (-0.14,0.00)  | 0.0590  | 0.21             | (-0.06,0.49) | 0.1217 |                   |              |        |
| <i>QPCTL</i>        | rs2287019  | -0.02                   | (-0.07,0.03)  | 0.4095  |                  |              |        | 0.05              | (-0.07,0.18) | 0.3757 |
| <i>RPL27A</i>       | rs4929949  | 0.03                    | (-0.01,0.06)  | 0.1927  |                  |              |        | -0.02             | (-0.11,0.06) | 0.5515 |
| <i>SEC16BLZTR2</i>  | rs543874   | 0.03                    | (-0.02,0.08)  | 0.2482  |                  |              |        | 0.00              | (-0.10,0.10) | 0.9993 |
| <i>SH2B1</i>        | rs4788102  | 0.00                    | (-0.04,0.04)  | 0.9138  | 0.04             | (-0.04,0.12) | 0.3338 |                   |              |        |
| <i>SH2B1_APOB48</i> | rs7359397  | -0.01                   | (-0.05,0.03)  | 0.7390  |                  |              |        | -0.04             | (-0.12,0.05) | 0.3970 |
| <i>SLC39A8</i>      | rs13107325 | -0.08                   | (-0.15,0.00)  | 0.0380  |                  |              |        |                   |              |        |
| <i>TFAP2B</i>       | rs987237   | 0.03                    | (-0.02,0.08)  | 0.2913  |                  |              |        | 0.02              | (-0.07,0.11) | 0.7010 |
| <i>TMEM160</i>      | rs3810291  | -0.04                   | (-0.08,0.00)  | 0.0527  | 0.06             | (-0.03,0.16) | 0.1612 | 0.02              | (-0.07,0.10) | 0.6956 |
| <i>TMEM18</i>       | rs6548238  | 0.07                    | (0.02,0.12)   | 0.0058  |                  |              |        |                   |              |        |
| <i>TNNI3K</i>       | rs1514175  | 0.01                    | (-0.03,0.05)  | 0.7563  |                  |              |        | 0.01              | (-0.08,0.09) | 0.8786 |

Abbreviations: SNP, single nucleotide polymorphism, MVPA, moderate to vigorous physical activity, BMI, body mass index, CI confidence interval

Sorted by nearby gene

<sup>1</sup>Main effect model: Multivariable linear model of adolescent BMI regressed on SNP, controlling for age, sex, MVPA, current smoking, screen time, region, indicator for self-reported heights and weights, oversampling of highly educated African Americans (AA stratum only), Hispanic subpopulation ancestry, as well as an indicator for foreign born (n= 268, HA stratum only). Random

intercepts allowed for individual, family and school with no sample weighting. Models run separately for each SNP and race/ethnicity. P values corrected for multiple testing are  $\alpha$  equal to 0.05/number of SNPs tested (0.0012 in EA, 0.0026 in AA, 0.0014 in HA)

<sup>2</sup>Considered for interaction assessment 41 SNPs in EA, 37 in HA, and 19 in AA

**Table S6.** Genotype frequencies for the 3 adiposity related loci with observed nominally significant ( $p < 0.05$ ) interactions<sup>1</sup> by MVPA<sup>2</sup> and race/ethnicity

|                                | Low MVPA<br>( $< 5$ bouts /wk) | High MVPA<br>( $5+$ bouts/wk) | Total        |
|--------------------------------|--------------------------------|-------------------------------|--------------|
| <b>European American</b>       |                                |                               |              |
| <i>FTO</i> (rs9939609)         |                                |                               |              |
| TT                             | 661 (36.0)                     | 1,190 (37.3)                  | 1,851 (36.8) |
| AT                             | 888 (48.4)                     | 1,518 (47.5)                  | 2,406 (47.8) |
| AA                             | 286 (15.6)                     | 486 (15.2)                    | 772 (15.4)   |
| Total, N                       | 1,835                          | 3,194                         | 5,029        |
| <i>GNPDA2</i> (rs10938397)     |                                |                               |              |
| AA                             | 583 (31.8)                     | 1,031 (32.2)                  | 1,614 (32.0) |
| AG                             | 933 (50.8)                     | 1,589 (49.6)                  | 2,522 (50.1) |
| GG                             | 320 (17.4)                     | 581 (18.2)                    | 901 (17.9)   |
| Total, N                       | 1,836                          | 3,201                         | 5,037        |
| <b>Hispanic American</b>       |                                |                               |              |
| <i>LZTR2/SEC16B</i> (rs543874) |                                |                               |              |
| AA                             | 369 (68.3)                     | 501 (66.8)                    | 870 (67.4)   |
| AG                             | 149 (27.6)                     | 221 (29.5)                    | 370 (28.7)   |
| GG                             | 22 (4.1)                       | 28 (3.7)                      | 50 (3.9)     |
| Total, N                       | 540                            | 750                           | 1,290        |

Unless otherwise noted, No and column percentages presented

<sup>1</sup> Interaction model: Multivariable linear model of adolescent BMI regressed on SNP, MVPA, and SNP-by-MVPA interaction, controlling for age, sex, current smoking, screen time, region, indicator for self-reported heights and weights, oversampling of highly educated African Americans (AA stratum only), Hispanic subpopulation ancestry, as well as an indicator for foreign born (HA stratum only). Random effects allowed for individual, family and school with no sample weighting. Models were run separately for each SNP and race/ethnicity. Likelihood ratio tests were used to assess statistical interaction between the main effects (no interaction term) model and the interaction model, separately for each SNP by race/ethnicity. P values corrected for multiple testing are  $\alpha$  equal to  $0.05/\text{number of SNPs tested}$  (0.0012 in EA and 0.0014 in HA).

<sup>2</sup> High MVPA: 5 or more bouts per week of MVPA, low MVPA: less than 5 bouts per week of MVPA

**Table S7.** Model results for the three nominally significant interactions ( $p < 0.05$ )<sup>1</sup> between adiposity related loci by MVPA<sup>2</sup> in association with BMI-for-age Z scores in the overweight/obese<sup>3</sup> European Americans and Hispanic Americans

|                                                     | $\beta$ (95% CI)     |
|-----------------------------------------------------|----------------------|
| <b>European American</b>                            |                      |
| <i>FTO</i> (rs9939609 per copy of A allele)         | 0.08 (0.02, 0.13)    |
| MVPA (high versus low)                              | -0.11 (-0.19, -.02)  |
| rs9939609 x MVPA                                    | -0.05 (-0.12, 0.22)  |
| p for interaction <sup>1</sup>                      | 0.18                 |
| <br>                                                |                      |
| <i>GNPDA2</i> (rs10938397 per copy of G allele)     | 0.07 (0.01, 0.12)    |
| MVPA (high versus low)                              | -0.10 (-0.18, -0.02) |
| rs10938397 x MVPA                                   | -0.05 (-0.12, -0.02) |
| p for interaction <sup>1</sup>                      | 0.18                 |
| <br>                                                |                      |
| <b>Hispanic American</b>                            |                      |
| <i>LZTR2/SEC16B</i> (rs543874 per copy of G allele) | 0.01 (-0.10, 0.12)   |
| MVPA (high versus low)                              | 0.01 (-0.10, 0.12)   |
| rs5438749 x MVPA                                    | 0.00 (-0.16, -0.16)  |
| p for interaction <sup>1</sup>                      | 0.99                 |

Abbreviations: SNP, single nucleotide polymorphism, BMI, body mass index, MVPA, moderate to vigorous physical activity, CI, confidence interval, EA, European Americans, HA, Hispanic Americans

<sup>1</sup> Beta estimates are presented for the SNP, MVPA, SNP by MVPA interaction terms, and main effects in the interacted multivariable linear model of adolescent BMI-for-age Z scores regressed on SNP, MVPA, and SNP-by-MVPA interaction, controlling for age, sex, current smoking, screen time, region, indicator for self-reported heights and weights, oversampling of highly educated African Americans (AA stratum only), Hispanic subpopulation ancestry, as well as an indicator for foreign born (HA stratum only). Random effects allowed for individual, family and school with no sample weighting. Models were run separately for each SNP and race/ethnicity. Likelihood ratio tests were used to assess statistical interaction between the main effects (no interaction term) model and the interaction model, separately for each SNP by race/ethnicity. P values corrected for multiple testing are  $\alpha$  equal to  $0.05/\text{number of SNPs tested}$  (0.0012 in EA and 0.0014 in HA).

<sup>2</sup> High MVPA: 5 or more bouts per week of MVPA, low MVPA: less than 5 bouts per week of MVPA

<sup>3</sup> Overweight and obese defined by (BMI  $\geq 25$  kg/m<sup>2</sup>; IOTF cut-off points)[33]. Sample sizes were in EA: 1,442 and in HA: 451.
